# Supplementary material for: The modulation of MiR-155 and MiR-23a manipulates Klebsiella pneumoniae Adhesion on Human pulmonary Epithelial cells via Integrin α5β1 Signaling
Source: PubMed Central journal article supplement (PMC4989230; doi:10.1038/srep31918), 2016-08-18

**The modulation of MiR-155 and MiR-23a manipulates  
*Klebsiellapneumoniae* Adhesion on Human pulmonary Epithelial  
cells via Integrin  $\alpha 5\beta 1$  Signaling**

Yan Teng<sup>1a</sup>, Junming Miao<sup>1a</sup>, Xiaofei Shen<sup>1</sup>, Xiaolong Yang<sup>1</sup>, Xinyuan Wang<sup>1</sup>,  
Laibing Ren<sup>1</sup>, Xiaoying Wang<sup>1</sup>, Junli Chen<sup>1</sup>, Jingyu Li<sup>1</sup>, Shanze Chen<sup>1</sup>, Yi Wang<sup>1\*</sup>,  
Ning Huang<sup>1\*</sup>

1 Research Unit of Infection and Immunity, Department of Pathophysiology, West  
China College of Basic and Forensic Medicine, Sichuan University, Chengdu 610041,  
China

\* These authors are both Corresponding authors.

<sup>a</sup>These authors contributed equally to this work.

Tel: +86 02885501243;

E-mail: [huangpanxiao@sina.com](mailto:huangpanxiao@sina.com) (Ning Huang). [wangyi@stu.scu.edu.cn](mailto:wangyi@stu.scu.edu.cn) (Yi Wang)

**FigS1. Relative expression of miR-155 and pri-miR-155 under *K. pneumoniae* LPS stimulation.**

A549 and HBE16 cells were exposed to increasing doses of *K. pneumoniae* (MOI=0, 50, 100) for 2 hours, or fixed amount of bacteria (MOI=100) at indicated time points (0hr, 2hr, 4hr and 6hr). The expression levels of miR-155 (A) and pri-miR-155 (B and C) were examined by RT-qPCR. RAW264.7 and A549 cells were stimulated by LPS (10 ng/mL) or exposed to fixed amount of bacteria (MOI=100) at indicated time points (0hr, 2hr and 6hr), the expression level of miR-155 (D and E) was examined by RT-qPCR. The Relative expression was normalized to U6 and then converted to the fold change over uninfected or unstimulated. (Data are the mean  $\pm$  SD and represent three individual experiments. \* $p$ <0.05, \*\* $p$ <0.01 compared with *K. pneumoniae* LPS unstimulated).

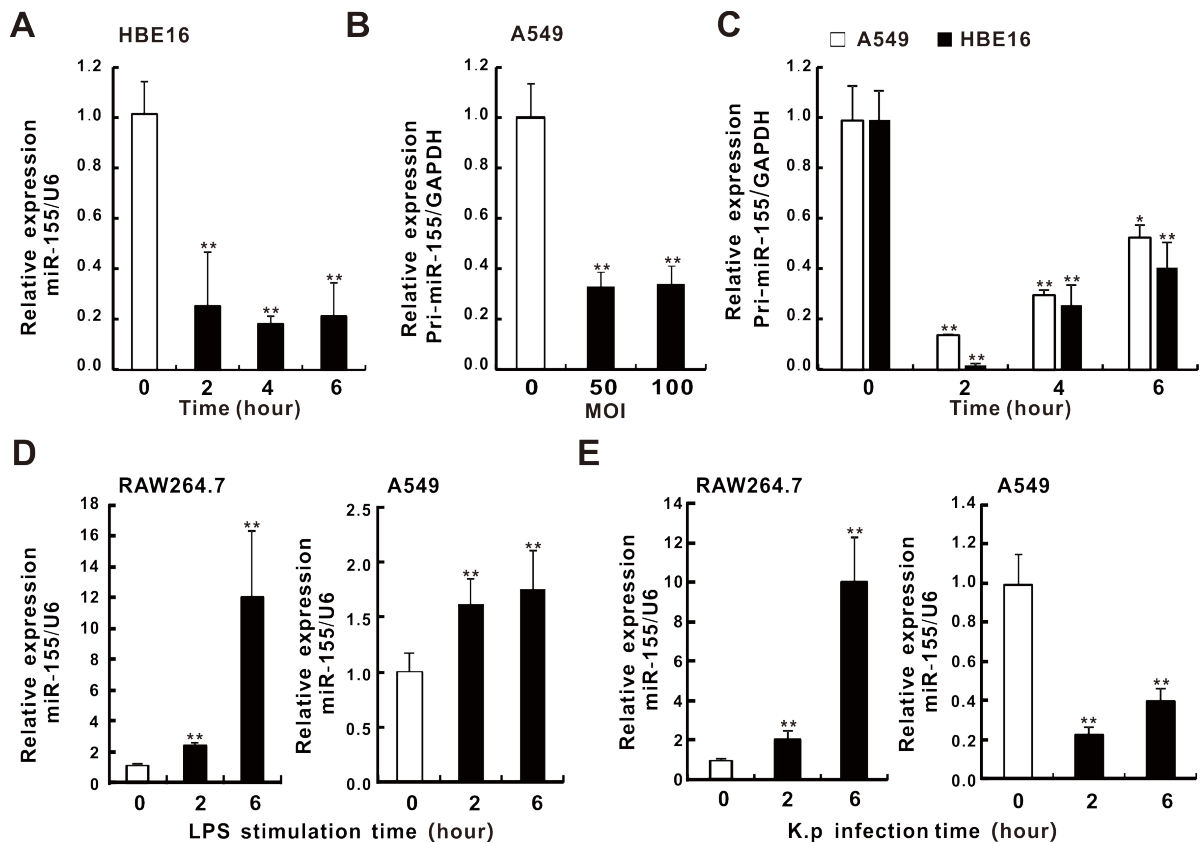

**FigS2. MiR-155 regulated the adhesion of *K. pneumoniae*.**

HBE16 cells were transfected with miR-155 mimic (A), inhibitor (B) and according negative control (miR-NC or NC) 24 hours prior to 100 MOI of *K. pneumoniae* exposure. The relative *K. pneumoniae* adhesion at indicated time points was determined by colony counts and represented after normalizing to 1 hour bacterial adhesion of miR-NC or NC. Relative expression of indicated miRNA after transfecting miR-155 mimic (C), inhibitor (D) or miR-23a mimic (E) in A549 or HBE16 cells (Folds over miR-NC or NC). (Data are the mean  $\pm$  SD and represent three individual experiments. \* $p < 0.05$ , \*\* $p < 0.01$ ).

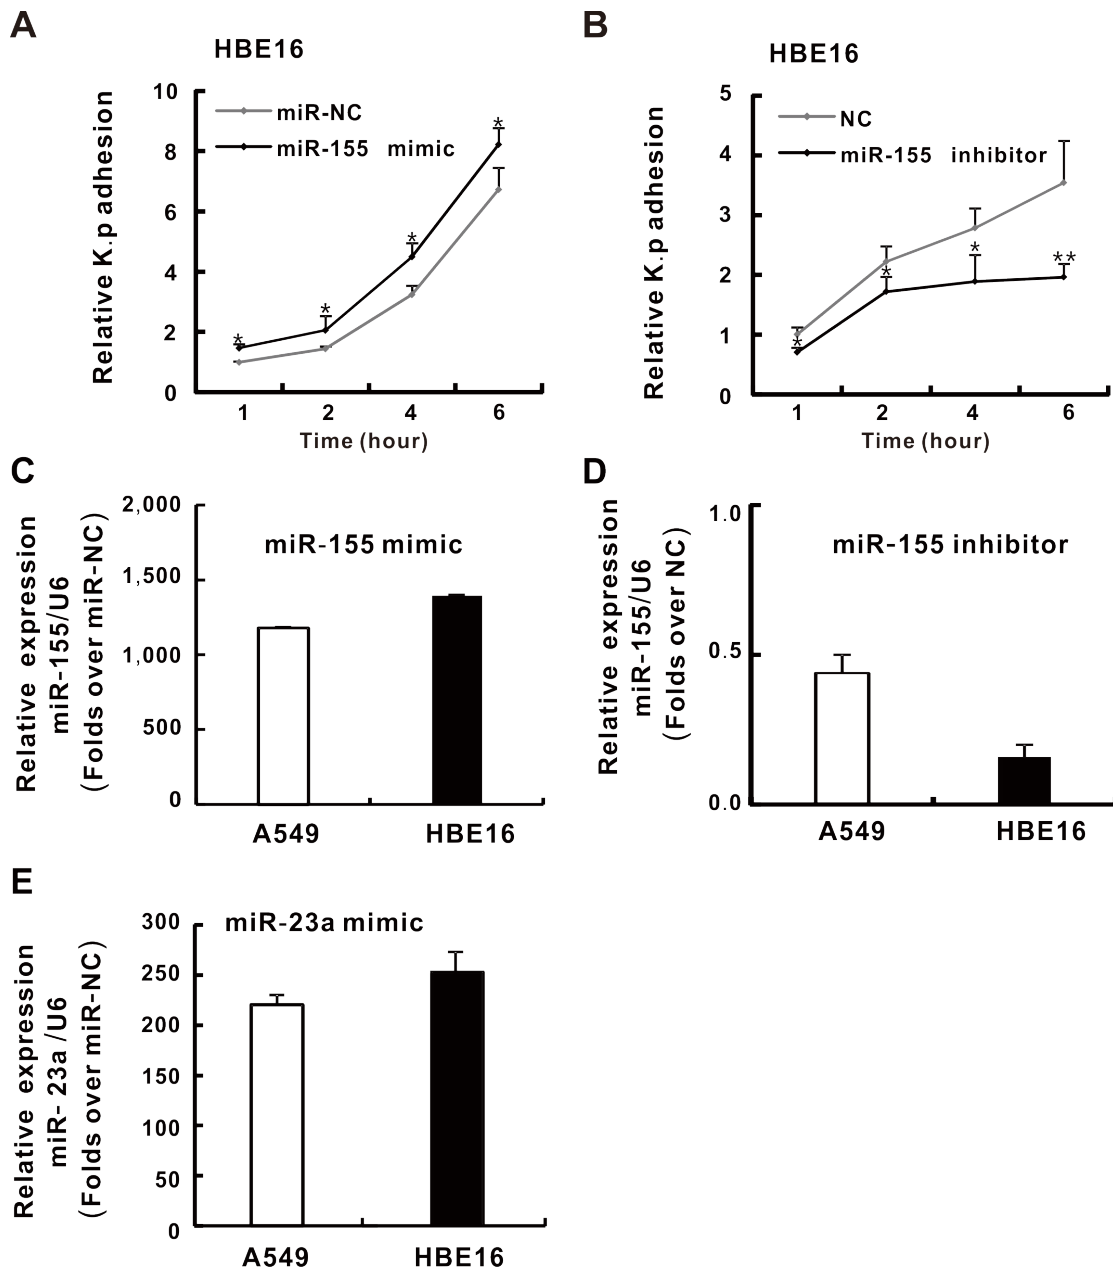

**FigS3. HMGN2 was potential target of miR-155 and miR-23a.**

(A) RT-qPCR analysis showing the change of HMGN2 mRNA level in *K. pneumoniae* infected A549 or HBE16 cells at different infection time points (MOI=100). (B) RT-qPCR analysis showing the effect of miR-155 mimic or inhibitor on the mRNA levels of HMGN2 in *K. pneumoniae* infected A549 and/or HBE16 cells (MOI=100 for 2 hours, same as B, C, D, E, and F). (C) A549 cells were co-transfected with miR-155 mimic or inhibitor and HMGN2 3' UTR wild-type (WT) luciferase reporter construct. Luciferase activity was measured 24hr after transfection. (D) A549 cells transfected with miR-155 mimic were treated with proteasome inhibitor (MG132, 20  $\mu$ M, 3 hours) the relative HMGN2 protein expression were assessed by Western blot. (E) HMGN2 protein levels of A549 cells transfected with pEx-HMGN2 or si-HMGN2 (Data are the mean  $\pm$  SD and represent three individual experiments. \*\* $p < 0.01$ ).

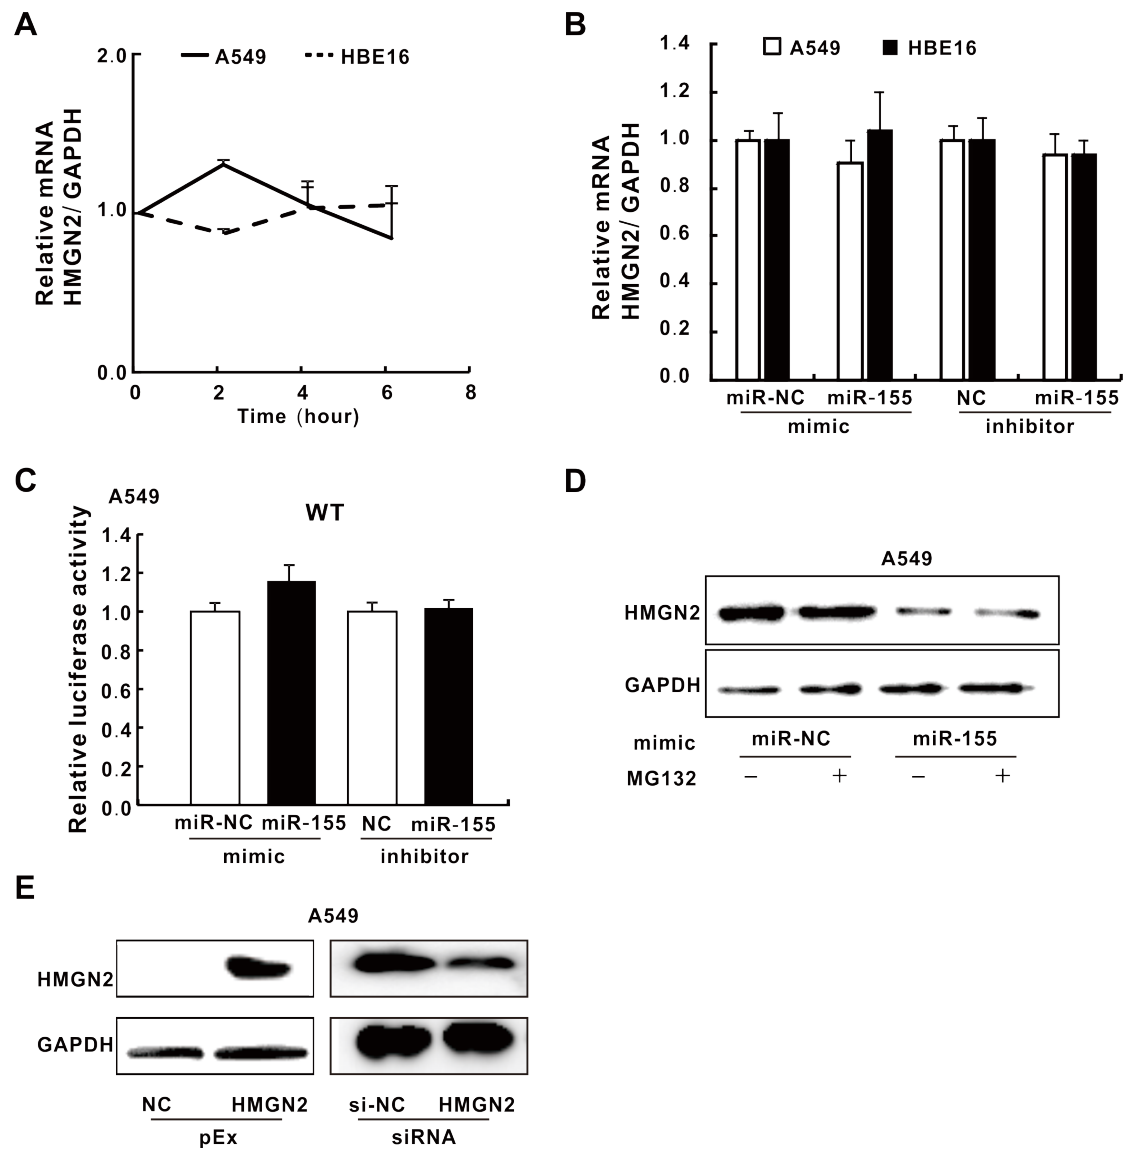

**FigS4. MiR-155 promoted integrin-Rac1 pathway in *K. pneumoniae*-infected HBE16 cells.**

(A) RT-qPCR analysis showing the integrin  $\alpha 5$  and  $\beta 1$  mRNA expression of HBE16 cells transfected with miR-155 mimic or miR-NC prior to *K. pneumoniae* infection (MOI=100 for 2 hours, same as B, D and E). Western blot analysis showing the levels of integrin  $\alpha 5$ , integrin  $\beta 1$ (B), Rac1-GTP, total Rac1 (D) and F-actin (E) in HBE16 cells treated as (A).(C) FN-cell Adhesion assay was performed to evaluate the effect of miR-155 mimic on HBE16 cells to associate with fibronectin coated plates. (Data are the mean  $\pm$  SD and represent three individual experiments. \* $p$ <0.05, \*\* $p$ <0.01 compared with miR-NC).

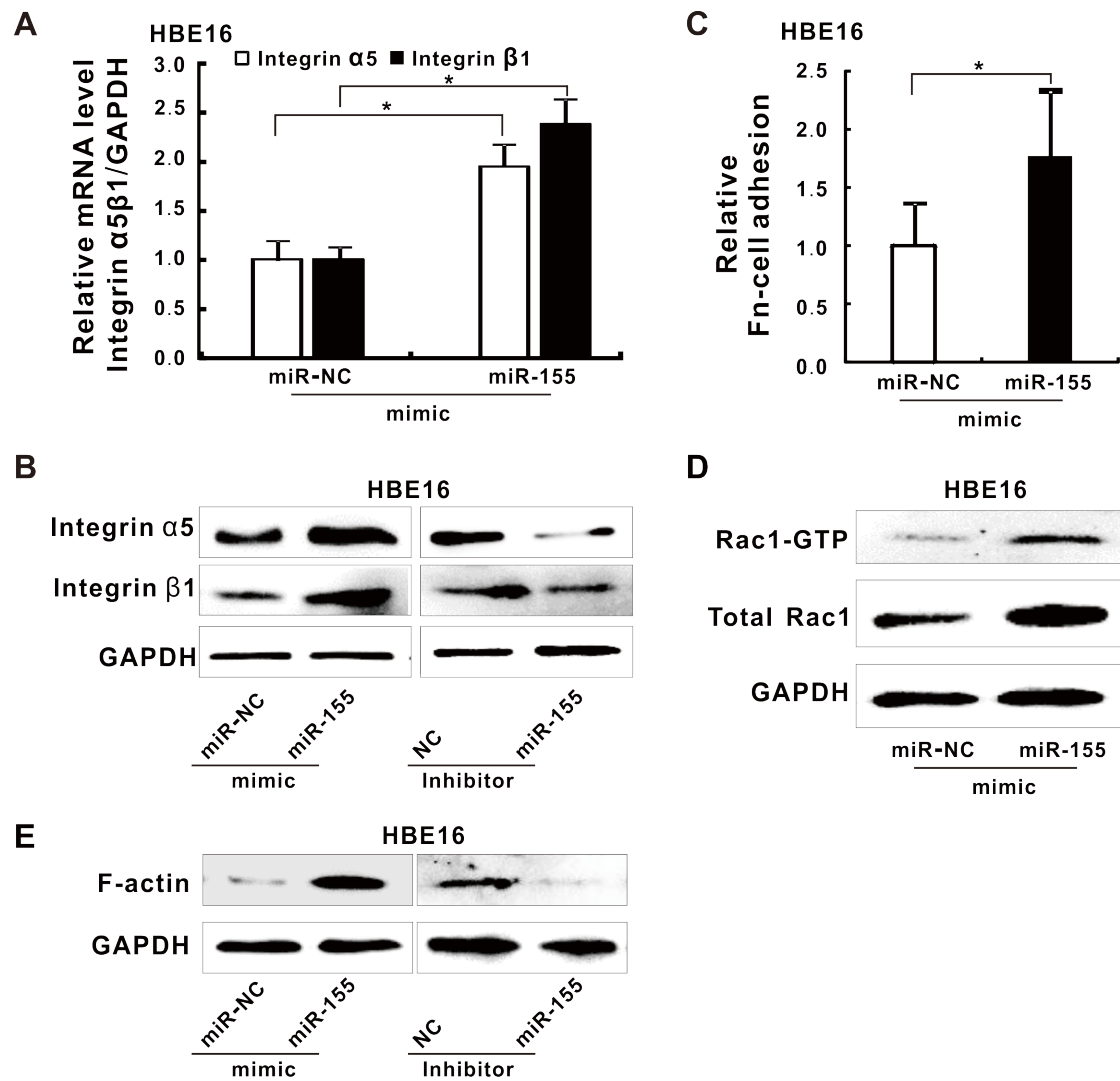

Supplement: srep31918-s1.pdf [file srep31918-s1.pdf]
